# Supplementary material
Source: publisher figshare collection journal article supplement (https://frontiersin.figshare.com/ndownloader/files/12981419)

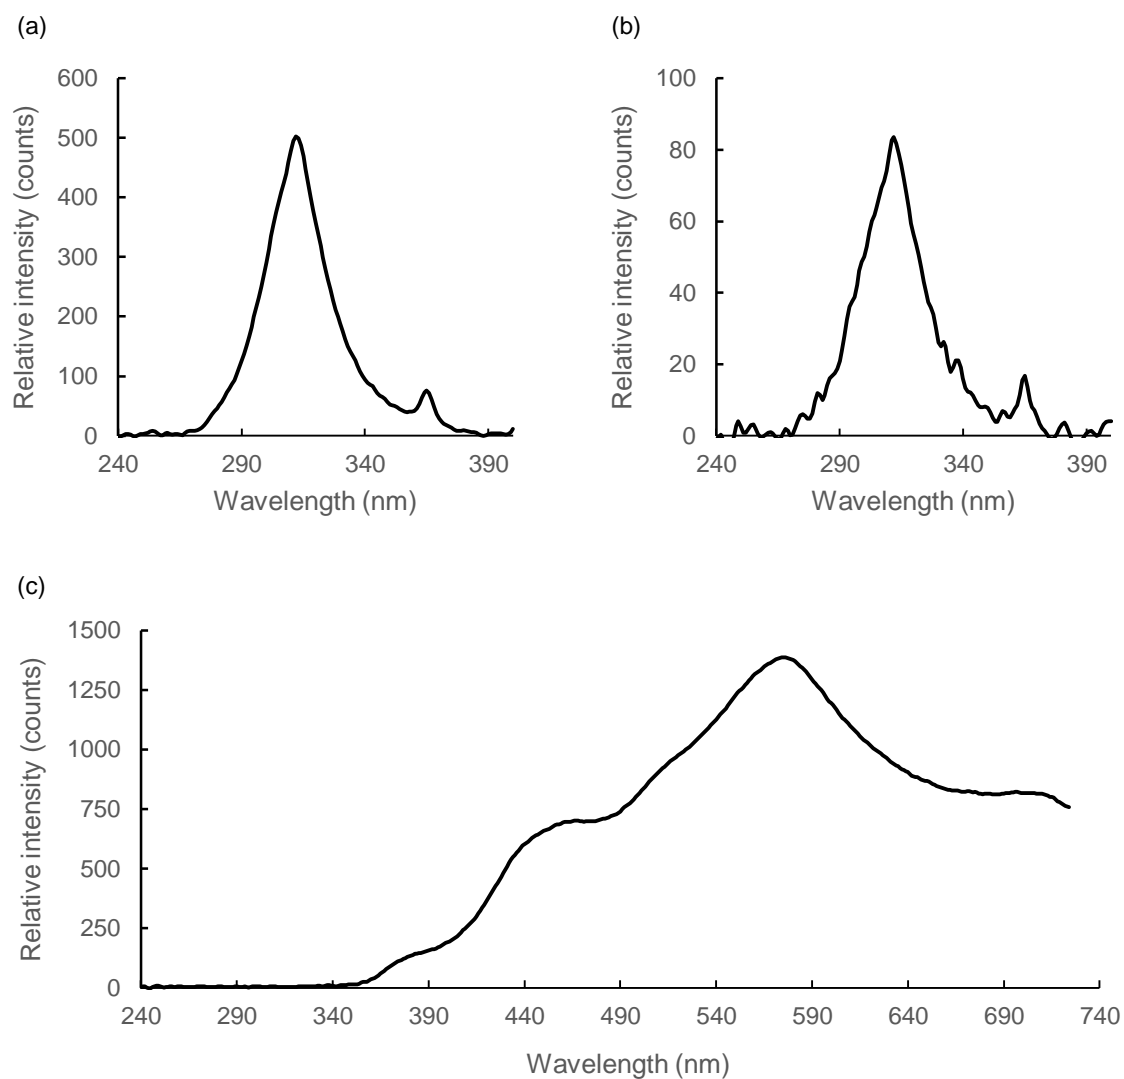

Figure S1. Wavelength spectra of 20 W (a) and 6 W (b) ultraviolet-B (UVB) lamps and a 130 W halogen lamp (c).

Supplement: Supplementary file 1 [file 12981419]
